1 Impact of Advanced Maternal Age on Physiologic Adaptations to Pregnancy in Vervet  
2 Monkeys

3 Maren Plant \*, Cecilia Armstrong \*, Alistaire Ruggiero, Chrissy Sherrill, Beth Uberseder,  
4 Rachel Jeffries, Justin Nevarez, Matthew J. Jorgensen, Kylie Kavanagh, Matthew A.  
5 Quinn

6 Affiliations: Department of Pathology, Section on Comparative Medicine, Wake Forest  
7 School of Medicine, Winston-Salem, North Carolina 27517

8 \* these authors contributed equally

9 The authors report no conflict of interest.

10 Funding Sources: NIH P40 OD010965, NIH T35 OD010946, NIH UL1-TR001420, NIH  
11 R25 HL092618

12 Correspondence Should be Addressed to:

13 Matthew A. Quinn, Ph.D.  
14 Wake Forest School of Medicine  
15 Medical Center Blvd  
16 Winston-Salem, NC 27157  
17 Office: 336-713-1995  
18 [mquinn@wakehealth.edu](mailto:mquinn@wakehealth.edu)

19 Word Count: 6,132

20 Number of Figures: 7

21 Number of Supplemental Figures: 2

22

23

24

25

26 **Abstract:**

27 Context: The trend to delay pregnancy in the United States has resulted in the number of  
28 advanced maternal age (AMA) pregnancies to also increase. In humans, AMA is associ-  
29 ated with a variety of pregnancy-related pathologies such as preeclampsia (PE). While  
30 AMA is known to be a factor which contributes to the development of pregnancy-induced  
31 diseases, the molecular and cellular mechanisms giving rise to this phenomenon are still  
32 very limited. This is due in part to lack of a pre-clinical model which has physiologic rele-  
33 vance to human pregnancy while also allowing control of environmental and genetic var-  
34 iability inherent in human studies.

35

36 Objective: To determine potential physiologic relevance of the vervet/African green mon-  
37 key (*Chlorocebus aethiops sabaeus*) as a pre-clinical model to study the effects of AMA  
38 on adaptations to pregnancy.

39

40 Design: Thirteen age-diverse pregnant vervet monkeys (3-16 y.o.) were utilized to meas-  
41 ure third trimester blood pressure (BP), complete blood count, iron measurements and  
42 hormone levels.

43

44 Results: Significant associations were observed between third trimester diastolic BP and  
45 maternal age. Furthermore, the presence of leukocytosis with enhanced circulating neu-  
46 trophils was observed in AMA mothers compared to younger mothers. Moreover, we ob-  
47 served a negative relationship between maternal age and estradiol, progesterone and  
48 cortisol levels. Finally, offspring born to AMA mothers displayed a postnatal growth retar-  
49 dation phenotype.

50

51 Conclusions: These studies demonstrate physiologic impairment in the adaptation to  
52 pregnancy in AMA vervet/African green monkeys. Our data indicate the vervet/African  
53 green monkey may serve as a useful pre-clinical model and tool for deciphering patho-  
54 logical mediators of maternal disease in AMA pregnancy.

55

56

57

58

59

60

61

62

63

64

65

66

67

68

69

70

71

72 **Introduction:**

73 Health quality and outcomes for pregnant mothers in the United States are not  
74 improving, even with the advancement of modern medicine. In fact, US pregnancy-related  
75 maternal mortalities rose 26.6% between 2000 and 2014<sup>1</sup>. Moreover, while the US infant  
76 mortality rate is not increasing, it is significantly higher than that of other developed coun-  
77 tries<sup>2</sup>. This data highlights a pressing need to understand maternal adaptations to preg-  
78 nancy in an effort to improve health outcomes for both the mother and child.

79 Over the last several decades, women and their partners more frequently choose  
80 to delay childbirth. The reasons for this change are multi-factorial, but include educational  
81 pursuit, access to reliable contraception, and economic uncertainty<sup>3</sup>. While the overall  
82 national fertility rate has steadily declined to the lowest numbers recorded in 32 years,  
83 the rate of advanced maternal age (AMA) pregnancies, defined as 35 years and older,  
84 has risen dramatically<sup>4</sup>. From 2000 to 2014, birth rates for women under 20 declined 42%  
85 while the number of women having their first child at age 35 or older rose 23%<sup>5</sup>. The  
86 emerging trend of AMA pregnancies is paramount to understand as AMA has been as-  
87 sociated with increased risk of several adverse maternal and fetal outcomes<sup>6-9</sup>. For ex-  
88 ample, AMA is associated with increased risk of gestational diabetes mellitus, placenta  
89 previa, and postpartum hemorrhage<sup>7</sup>. In addition, several adverse cardiovascular phe-  
90 nomena have been associated with AMA, including higher risk of developing hypertension  
91 and arrhythmias during pregnancy<sup>10</sup>. These conditions are clinically significant consider-  
92 ing that 26% of pregnancy-related deaths between 2006 and 2013 had cardiovascular  
93 etiologies<sup>10, 11</sup>. Hypertension during pregnancy can also be used to predict future changes  
94 for both mother and fetus; women diagnosed with pregnancy-related hypertension expe-

95 rience a 2-8 fold increase in risk for future hypertension,<sup>12-17</sup> while babies born to hyper-  
96 tensive mothers are more likely to develop cardiovascular disease themselves<sup>18-21</sup>. These  
97 human data reinforce the need to understand the biological underpinnings of AMA in an  
98 effort to improve health outcomes for both mother and child.

99         Despite the known connection between AMA and pregnancy-related diseases, a  
100 gap in knowledge still exists in the pathogenic drivers of this phenomenon in humans.  
101 This can somewhat be explained by lack of control over environmental conditions in hu-  
102 man studies, along with genetic heterogeneity in human populations. Furthermore, rodent  
103 models can lack physiological relevance to reproductive biology in humans. Therefore, a  
104 preclinical model with physiological relevance to human pregnancy as well as the ability  
105 to control environmental settings is needed to better define underlying mechanisms.

106         Previous non-human primate (NHP) models have noted similarities between hu-  
107 mans and NHPs in hormone physiology during pregnancy and in reproductive biology,  
108 which demonstrates their potential as appropriate human pregnancy models<sup>7</sup>. To address  
109 this pre-clinical need, we posit and describe herein the use of the vervet/African green  
110 monkey (*Chlorocebus aethiops sabaeus*) to model the effects of AMA on maternal adap-  
111 tation to pregnancy. We demonstrate this model as a pre-clinical platform to garner mech-  
112 anistic insight, in a tightly controlled environmental setting, into the effects of AMA on  
113 pregnancy-induced pathologies, with strong potential for human translational relevance.  
114 Our findings demonstrate dysregulated hormonal, cardiovascular, and immunological re-  
115 sponses to pregnancy in AMA vervets, all modeling known maladaptive responses to  
116 pregnancy in humans. Collectively, our results show that vervets are a clinically relevant

117 model to study the effects of AMA in both maternal and fetal aspects and allow us to  
118 compensate for the shortcomings of existing human and animal studies.

119

120

121

122

123

124

125

126

127

128

129

130

131

132

133

134

135

136

137

138

139

140 **Materials and Methods:**

141 **Cohort Selection**

142 A cohort of 13 vervet/African green monkeys (*Chlorocebus aethiops sabaenus*) was se-  
143 lected from the Vervet Research Colony at Wake Forest University School of Medicine.  
144 All animals were colony-born, mother-reared, of known-age and were housed in species-  
145 typical, matrilineal social groups. Pregnancy status and estimated gestational age was  
146 determined via ultrasound as previously described<sup>22</sup>. Modal age of first birth is 4 years  
147 old in this colony. Monkeys 3-9 years old were considered optimal maternal age, while  
148 monkeys 10 and older were considered to be AMA. In addition, the cohort included pri-  
149 miparous (n=6) and multiparous (n=7) mothers. None of the selected animals exhibited  
150 any other comorbidities such as diabetes or heart disease. Other elimination criteria for  
151 this study included active participation in other studies. All studies were conducted under  
152 the approval of the Institutional Animal Care and Use Committee (IACUC) at Wake Forest  
153 School of Medicine.

154

155 **Diet**

156 All animals were maintained on a standard chow diet (Monkey Diet Jumbo 5037, LabDiet,  
157 St. Louis, MO). Animals were fed *ad libitum* except for fasting on the day of sedated pro-  
158 cedures.

159

160 **Sedation Protocol**

161 Animals were sedated via intramuscular injections of ketamine (10mg/kg) and midazolam  
162 (0.1mg/kg). When necessary, a booster dose (50% of induction dose) was administered  
163 to maintain sedation.

164

### 165 **Blood pressure**

166 Systolic and diastolic blood pressure (BP) were measured via high definition oscillometry  
167 (S+B medVET, Babenhausen, Germany) as previously described<sup>23, 24</sup>. Three high quality  
168 measurements were recorded and then averaged to ensure accuracy.

169

### 170 **Complete Blood Counts**

171 Blood was collected via femoral venipuncture into EDTA vacutainers (BD Biosciences;  
172 Warwick, RI) approximately two weeks prior to parturition and again 2-5 days postpartum;  
173 500  $\mu$ L of whole blood were isolated and sent to IDEXX laboratories (Westbrook, ME)  
174 for analysis including a complete blood count (CBC). The remaining blood was centri-  
175 fuge, and the resulting plasma was collected and stored at -80°C for further analysis.

176

### 177 **Ultrasound**

178 Under sedation, ultrasound (Sonosite M-Turbo; Bothell, WA) was used to measure the  
179 biparietal diameter of the fetus *in utero* as previously described<sup>22</sup>. Three measurements  
180 were recorded to calculate an average diameter to ensure accuracy.

181

### 182 **Iron Assays**



183 Plasma was analyzed with the BioVision (Milpitas, CA) Total Iron-Binding Capacity (TIBC)  
184 and Serum Iron Assay Kit (Colorimetric) according to manufacturer's instructions. Analy-  
185 sis determined the unbound iron, TIBC + unbound iron, free iron and free iron + transferrin  
186 bound iron. These values were used to calculate the TIBC, plasma iron and percent trans-  
187 ferrin saturation.

188

### 189 **Hormone Measurements**

190 Plasma was used to determine hormone levels via commercially available enzyme-linked  
191 immunosorbent assays for estradiol using the Estradiol Parameter Assay Kit (R&D Sys-  
192 tems; Minneapolis, MN, USA) according to manufacturer's instructions. Progesterone  
193 was measured with the Progesterone Human ELISA kit per manufacturer's protocol (IBL-  
194 International; Hamburg, Germany). Finally, cortisol levels were detected utilizing a com-  
195 mercially available kit following manufacturer's instructions (R&D Systems).

196

### 197 **Statistical Analysis**

198 When comparing two groups an unpaired student's T-test was used to determine signifi-  
199 cance. Associations were determined with linear regression analysis. Significance was  
200 determined if  $p < 0.05$ .

201

202

203

204

205

206 **Results:**

207 **Maternal Age and Blood Pressure**

208 Given the increased risk for the development of preeclampsia with AMA in humans<sup>25, 26</sup>,  
209 we measured BP near the end of the third trimester (approximately two weeks before  
210 parturition) in a cohort of age diverse vervets (n=13). Comparing systolic BP with maternal  
211 age revealed no significant relationship ( $R^2=0.113$ ;  $p=0.2614$ ) (Fig. 1A). On the other  
212 hand, maternal age had a significant positive association with diastolic BP ( $R^2=0.3212$ ;  
213  $p=0.0434$ ) (Fig. 1B). In women, the incidence of preeclampsia decreases substantially in  
214 mothers from their first child to their second child<sup>25, 27, 28</sup>. Therefore, we wanted to deter-  
215 mine if multiparity might mask the presence of clinical preeclampsia in our AMA cohort.  
216 There was a significant positive association between maternal age and number of off-  
217 spring ( $R^2=0.9295$ ;  $p<0.0001$ ) (Supplemental Figure 1). Given the strong association be-  
218 tween maternal age and number of offspring we wanted to determine if the protective  
219 effects of previous pregnancies are equivalent in young and AMA vervets. This revealed  
220 a trend for lower systolic and diastolic BP in young mothers with increasing number of  
221 pregnancies ( $p=0.0554$  &  $p=0.3237$  respectively) (Fig. 1C&D). Strikingly, we found in  
222 AMA a significant and strong relationship between number of offspring and both diastolic  
223 and systolic BP ( $p=0.0404$  &  $p=0.0014$  respectively) (Fig. 1C&D).

224

225 **Leukocytosis in AMA Mothers**

226 Activation of the maternal immune system is a well appreciated contributor to the devel-  
227 opment of preeclampsia<sup>29-31</sup>. Given the association between maternal age and increasing  
228 diastolic BP we sought to determine if maternal age altered third trimester immune cell

229 composition. Complete blood cell counts indicated a significant positive relationship be-  
230 tween circulating white blood cell (WBC) number and maternal age (Fig. 2A). Stratifying  
231 monkeys between young and AMA revealed significantly higher circulating WBCs in AMA  
232 mothers compared to their younger counterparts (Fig. 2B). Our initial screen to determine  
233 the cellular components contributing to leukocytosis in AMA mothers revealed no signifi-  
234 cant alterations in total circulating lymphocyte counts ( $R^2=0.02977$ ;  $p=0.5730$ ) (Supple-  
235 mental Figure 2).

236

### 237 **Stress Leukogram in AMA Mothers**

238 Growing evidence indicates a role for adaptive immune cell activation in the context of  
239 preeclampsia<sup>32</sup>. We therefore assessed circulating components of the adaptive immune  
240 system including monocytes, basophils, neutrophils and eosinophils. While no alterations  
241 were observed in total monocyte ( $R^2=0.02997$ ;  $p=0.6211$ ) and basophil numbers  
242 ( $R^2=0.01578$ ;  $p=0.6826$ ) in the circulation related to maternal age (Fig. 3A&B), we ob-  
243 served trends for increased neutrophils with AMA ( $R^2=0.2835$ ;  $p=0.061$ ) (Fig. 3C) and a  
244 significant negative association between maternal age and eosinophil numbers  
245 ( $R^2=0.4016$ ;  $p=0.02$ ) (Fig. 3D). The presence of neutrophilia and eosinopenia is charac-  
246 teristic of a stress leukogram response<sup>33</sup>.

247

### 248 **Maternal Body Weight and AMA**

249 To gain insight into mechanisms underlying altered immune and cardiovascular re-  
250 sponses we assessed maternal body weight as a risk factor. We observed no significant  
251 association between maternal age and maternal pre-pregnancy body weight (Fig. 4).

252

### 253 **AMA does not elicit Anemia**

254 We next determined if AMA promotes the development of gestational anemia. We evalu-  
255 ated several parameters associated with anemia in our cohort including red blood cell  
256 count, hematocrit and hemoglobin levels. AMA did not alter any biomarker associated  
257 with anemia (Fig. 5A-5C). Furthermore, normal serum iron levels (Fig. 5D), total iron bind-  
258 ing capacity (Fig. 5E) and % transferrin saturation (Fig. 5F) confirmed the absence of  
259 altered iron homeostasis in older mothers.

260

### 261 **Altered Hormonal Responses in AMA Mothers**

262 AMA is associated with low peak gestational estradiol levels<sup>34-36</sup> and estrogen deficiency  
263 has been shown to promote diastolic dysfunction<sup>37</sup>. Therefore, we measured third tri-  
264 mester estradiol levels in our cohort of young and AMA vervets. Enzyme-linked immuno-  
265 sorbent assay (ELISA) revealed AMA mothers had significantly lower third trimester es-  
266 tradiol levels (~60% reduction;  $R^2=0.4462$ ;  $p=0.0176$ ) (Fig. 6A). Further, we found a trend  
267 for a negative association between maternal age and circulating third trimester progester-  
268 terone levels ( $R^2=0.2765$ ;  $p=0.0791$ ) (Fig. 6B). Finally, given the presence of a stress  
269 leukogram signature in our AMA mothers, we also measured cortisol levels, revealing a  
270 significant negative relationship ( $R^2=0.5832$ ;  $p=0.0038$ ) between maternal age and third  
271 trimester cortisol levels (Fig. 6C).

272

### 273 **Postnatal Growth Retardation in Offspring from AMA Mothers**

274 We measured fetal biparietal diameter approximately two weeks prior to delivery via ul-  
275 trasound. No appreciable differences were observed in fetal biparietal diameter within our  
276 cohort (Fig. 7A). Accordingly, we also did not observe significant differences in infant body  
277 weights between young and AMA age mothers at birth (Fig. 7B). However, following ar-  
278 chival growth trajectories over approximately the first year of life in a separate cohort of  
279 animals (n=28 young and n=14 aged) revealed significant growth retardation in infants  
280 born to AMA mothers (Fig. 7B).

281

282

283

284

285

286

287

288

289

290

291

292

293

294

295

296

## 297 **Discussion**

298           AMA in humans is an established risk factor for the development of an array of  
299 pregnancy-induced pathologies<sup>6, 8, 26, 38, 39</sup>. While the relationship between maternal age  
300 and the incidence of pregnancy-related pathologies exists, pre-clinical models with similar  
301 reproductive physiology to that of humans are severely lacking. The current study clearly  
302 shows that AMA is associated with disruptions in physiological adaptations to pregnancy  
303 in vervet/African green monkeys. In particular, we found the cardiovascular system, im-  
304 mune system and endocrine system all display deficits in responses to pregnancy, sug-  
305 gesting the presence of maternal pathologies in older vervet monkeys. Additionally, first  
306 year growth trajectories were impaired in infants born to AMA mothers. These data col-  
307 lectively indicate the vervet monkey as a physiologically relevant pre-clinical model to  
308 study the effects of AMA on both maternal and offspring outcomes.

309           Human studies have revealed a selective increase in third trimester diastolic blood  
310 pressure and a decrease in systolic BP with increased maternal age<sup>40</sup>. Consistent with  
311 these findings, we observed maternal age to be significantly positively associated with  
312 diastolic BP in our vervet model. Contrary to the human studies however, we observed  
313 no relationship between age and third trimester systolic BP. These findings indicate that  
314 the vervet monkey recapitulates some, but not all aspects of altered BP regulation during  
315 pregnancy in older mothers. Gaillard *et al.* indicated that a woman's maternal age per se  
316 was not consistently correlated with gestational hypertension, and that maternal body  
317 mass index might influence alterations in BP regulation during pregnancy<sup>38</sup>. In fact, ma-  
318 ternal obesity has been shown to interact with maternal age to promote a variety of other  
319 pregnancy-induced pathologies<sup>38</sup>. We observed no association between maternal body

320 weight and maternal age (Figure 4), which may explain differences observed between  
321 our study in vervet monkeys and human studies in the regulation of third trimester systolic  
322 BP.

323 Beyond elevated BP, a significant immunological component to preeclampsia ex-  
324 ists<sup>30-32, 41-43</sup>. While leukocytosis occurs during normal pregnancy<sup>44</sup>, exaggerated leuko-  
325 cytosis occurs in preeclamptic patients<sup>45</sup>. Our observation in the vervet monkey that AMA  
326 mothers have significantly elevated white blood cell counts coupled to the presence of  
327 diastolic hypertension are consistent with hallmarks of human preeclampsia. Intriguingly,  
328 leukocytosis present in humans with preeclampsia is due to an increase in circulating  
329 neutrophils counts<sup>45</sup>. Similar to our other data supporting physiological relevance of ver-  
330 vet monkeys to humans for studying the effects of AMA, the older mothers exhibited a  
331 higher degree of neutrophilia present in their third trimester compared to young mothers,  
332 potentially exacerbating a state of mild preeclampsia.

333 We did observe a significant positive association in our cohort between maternal  
334 age and parity. The elevated parity in our AMA could actually be providing a protective  
335 mechanism against the development of more severe preeclampsia, as this disease is  
336 more prevalent amongst primiparous mothers<sup>25, 27, 28</sup>. We observed an uncoupling of num-  
337 ber of previous offspring and blood pressures between young and AMA mothers. Our  
338 data suggest that previous pregnancies are associated with lowered blood pressures in  
339 younger mothers; however, in AMA mothers the number of pregnancies was positively  
340 associated with both diastolic and systolic BP. These data suggest that either AMA dis-  
341 rupts the protective mechanisms afforded by previous pregnancies, or, that after a certain  
342 threshold of previous pregnancies the protective mechanism of parity is lost. Parity has

343 also been associated with immunological tolerance to certain infections during pregnancy  
344 such as malaria<sup>46-48</sup> and multiparity has been demonstrated to confer immunotolerance  
345 in rodent models of stroke<sup>49</sup>, indicating a protective role to maternal health in multiparous  
346 mothers. While not tested in the current study, further investigation into AMA primiparous  
347 third trimester physiology is warranted to determine if multiparity is protective against the  
348 development of clinical preeclampsia.

349 Another known risk factor for the development of preeclampsia in humans is the  
350 presence of pregnancy-induced anemia<sup>50-52</sup>. Furthermore, maternal age and parity have  
351 been shown to be associated with the presence of anemia in humans<sup>53, 54</sup>. However, we  
352 did not observe such associations between anemia and maternal age and multiparity in  
353 our study. One explanation for the lack of association between maternal age and anemia  
354 in our study is due to diet; while maternal age is associated with the development of ane-  
355 mia in humans, this is largely due to insufficient iron intake during pregnancy<sup>55-57</sup>. Our  
356 vervet diet has high levels of iron (230 ppm), which could potentially compensate for AMA  
357 as a risk factor.

358 Estradiol is a well-known cardioprotective hormone. In the non-pregnant state, low  
359 estradiol levels, such as those observed during menopause, promote the development of  
360 cardiovascular disease<sup>58, 59</sup>. Specifically, postmenopausal women are the primary clinical  
361 population diagnosed with heart failure with preserved ejection fraction (HfpEF)<sup>60-62</sup>. The  
362 cardioprotective effects of estradiol in preventing HfpEF in estrogen deficient females has  
363 been extended to nonhuman primates such as cynomolgus macaques<sup>37</sup>. In the pregnant  
364 state, low estrogen levels have been associated with preeclampsia in humans<sup>63-67</sup>. We



365 found AMA is associated with third trimester estrogen deficiency in vervet monkeys, con-  
366 sistent with human data indicating maternal age is negatively correlated with low peak  
367 estradiol levels<sup>34-36</sup>. At the molecular level, estrogens have been shown to antagonize  
368 the effect of stress hormones<sup>68-71</sup>. We have demonstrated previously that the antagonistic  
369 nature of estrogen on stress hormones is essential for appropriate adaptations to preg-  
370 nancy and proper fetal development in rodents<sup>68</sup>. Our data indicate AMA disrupts the  
371 cortisol/estradiol axis through impaired estradiol production. Furthermore, the presence  
372 of a stress leukogram in AMA vervets is suggestive of aberrant stress hormone signaling  
373 in aged pregnant vervets<sup>33</sup>.

374 Maternal stress in humans, like AMA, underlies long-term predisposition of off-  
375 spring to disease into adulthood. This concept is known as the developmental origin of  
376 disease<sup>72</sup>. A commonality between maternal stress and AMA is they are both risk factors  
377 for the development of intrauterine growth restriction in humans and small gestational age  
378 infants<sup>6, 8, 38, 39, 73, 74</sup>. Our ultrasound data of fetal biparietal diameter revealed no associ-  
379 ation between maternal age and head size. Furthermore, infant weight at four days post-  
380 delivery was comparable between young and AMA mothers. In humans, one driver of the  
381 small gestational phenotype is pre-term delivery<sup>75-78</sup>. This may be a possible explanation  
382 for why we did not observe low birth weights in vervets, since AMA did not elicit pre-term  
383 delivery in our cohort. Beyond low birth weights, prenatal maternal stress in humans dra-  
384 matically alters postnatal growth rates of offspring. Intriguingly, the offspring growth rate  
385 phenotype is dictated by timing of maternal stress, with early stress typically leading to  
386 increased growth rates and late stress promoting decreased growth rates in offspring  
387 across 21 different mammalian species<sup>79</sup>. Our results of normal infant weight but blunted

388 postnatal growth is suggestive that AMA in vervets corroborates human data resultant of  
389 a maternal stress response late during gestation. An additional factor within the paradigm  
390 of maternal stress is maternal investment during lactation<sup>79</sup>. We did not cross foster or  
391 perform behavioral analyses in our young and AMA vervets post-delivery, therefore we  
392 cannot determine if AMA alters maternal investment during the nursing period.

393 Human studies limit the ability to establish disease causality. Rodent studies on  
394 the other hand allow for experimental manipulation to test mechanisms underlying dis-  
395 ease, but their reproductive physiology is dramatically different than that of humans. Uti-  
396 lizing an experimental model with direct physiological relevance would allow circumven-  
397 tion of these hurdles. Establishing the vervet monkey as a physiologically relevant pre-  
398 clinical model allows for the ability to tightly regulate environmental conditions and to col-  
399 lect longitudinal measurements, tissues and cells currently not feasible in human studies.  
400 This model will allow for the mechanistic dissection of how maternal age promotes preg-  
401 nancy-induced pathologies with high likelihood for clinical translation and the ability to  
402 impact human health.

403 One primary strength of our study is the establishment of a pre-clinical model with  
404 reproductive physiologic relevance to humans for studying the effects of aging on mater-  
405 nal health outcomes. Furthermore, the utilization of clinically relevant assays to charac-  
406 terize the impact of maternal age on adaptations to pregnancy is another primary strength  
407 of our study. One weakness with our study is that we focused only on third trimester  
408 physiology. It is of the utmost importance to further delineate the effects of AMA during  
409 gestation. Moreover, our studies are observational and descriptive in nature. Future stud-  
410 ies assessing the effects of estrogen supplementation in AMA vervets on amelioration of

411 cardiac and immunological responses to pregnancy are much needed. Finally, the study  
412 may not be powered for certain comparisons, leading to a Type II error such as maternal  
413 body weight and anemia related factors.

414 Our data demonstrate that AMA in vervets summarizes several maladaptive re-  
415 sponses observed in humans, particularly dysregulation of hormonal, cardiovascular and  
416 immunological responses to pregnancy, and establishes this model for further elucidation  
417 of the mechanisms involved in the stress responses involved in maternal adaptation to  
418 pregnancy and postnatal growth retardation in humans.

419

420

421

422

423

424

425

426

427

428

429

430

431

432

433

434 **Acknowledgements**

435 The authors would like to thank M. Christina May Long and Justin Herr for assistance with  
436 the Vervet Research Colony, and Dr. Tom Register and Ms. Maryanne Post for their tech-  
437 nical assistance with estradiol measurements. We would also like to thank the Biomarker  
438 Analytical Core of Wake Forest University Health Sciences for their assistance with cor-  
439 tisol and progesterone measurements.

440

441 **References:**

442 [1] MacDorman MF, Declercq E, Cabral H, Morton C: Recent Increases in the U.S.  
443 Maternal Mortality Rate: Disentangling Trends From Measurement Issues. *Obstet*  
444 *Gynecol* 2016, 128:447-55.

445 [2] He X, Akil L, Aker WG, Hwang HM, Ahmad HA: Trends in infant mortality in United  
446 States: a brief study of the Southeastern states from 2005-2009. *Int J Environ Res Public*  
447 *Health* 2015, 12:4908-20.

448 [3] Mills M, Rindfuss RR, McDonald P, te Velde E, Reproduction E, Society Task F: Why  
449 do people postpone parenthood? Reasons and social policy incentives. *Hum Reprod*  
450 *Update* 2011, 17:848-60.

451 [4] Brady E. Hamilton JAM, Michelle Osterman, Lauren Rossen: Births: Provisional Data  
452 for 2018. *Vital Statistics Rapid Release* 2019, 7.

453 [5] Hamilton TJMaBE: Mean Age of Mothers is on the Rise: United States, 2000-2014.  
454 *NCHS Data Brief* 2016, 232.

- 455 [6] Lean SC, Derricott H, Jones RL, Heazell AEP: Advanced maternal age and adverse  
456 pregnancy outcomes: A systematic review and meta-analysis. PLoS One 2017,  
457 12:e0186287.
- 458 [7] Yogev Y, Melamed N, Bardin R, Tenenbaum-Gavish K, Ben-Shitrit G, Ben-Haroush  
459 A: Pregnancy outcome at extremely advanced maternal age. Am J Obstet Gynecol 2010,  
460 203:558 e1-7.
- 461 [8] Khalil A, Syngelaki A, Maiz N, Zinevich Y, Nicolaides KH: Maternal age and adverse  
462 pregnancy outcome: a cohort study. Ultrasound Obstet Gynecol 2013, 42:634-43.
- 463 [9] Carolan MC, Davey MA, Biro M, Kealy M: Very advanced maternal age and morbidity  
464 in Victoria, Australia: a population based study. BMC Pregnancy Childbirth 2013, 13:80.
- 465 [10] De Viti D, Malvasi A, Busardo F, Beck R, Zaami S, Marinelli E: Cardiovascular  
466 Outcomes in Advanced Maternal Age Delivering Women. Clinical Review and Medico-  
467 Legal Issues. Medicina (Kaunas) 2019, 55.
- 468 [11] James AH, Jamison MG, Biswas MS, Brancazio LR, Swamy GK, Myers ER: Acute  
469 myocardial infarction in pregnancy: a United States population-based study. Circulation  
470 2006, 113:1564-71.
- 471 [12] Behrens I, Basit S, Melbye M, Lykke JA, Wohlfahrt J, Bundgaard H, Thilaganathan  
472 B, Boyd HA: Risk of post-pregnancy hypertension in women with a history of hypertensive  
473 disorders of pregnancy: nationwide cohort study. BMJ 2017, 358:j3078.
- 474 [13] Heida KY, Franx A, van Rijn BB, Eijkemans MJ, Boer JM, Verschuren MW, Oudijk  
475 MA, Bots ML, van der Schouw YT: Earlier Age of Onset of Chronic Hypertension and  
476 Type 2 Diabetes Mellitus After a Hypertensive Disorder of Pregnancy or Gestational  
477 Diabetes Mellitus. Hypertension 2015, 66:1116-22.

- 478 [14] Timpka S, Stuart JJ, Tanz LJ, Rimm EB, Franks PW, Rich-Edwards JW: Lifestyle in  
479 progression from hypertensive disorders of pregnancy to chronic hypertension in Nurses'  
480 Health Study II: observational cohort study. *BMJ* 2017, 358:j3024.
- 481 [15] Bokslag A, Teunissen PW, Franssen C, van Kesteren F, Kamp O, Ganzevoort W,  
482 Paulus WJ, de Groot CJM: Effect of early-onset preeclampsia on cardiovascular risk in  
483 the fifth decade of life. *Am J Obstet Gynecol* 2017, 216:523 e1- e7.
- 484 [16] Benschop L, Duvekot JJ, Versmissen J, van Broekhoven V, Steegers EAP, Roeters  
485 van Lennep JE: Blood Pressure Profile 1 Year After Severe Preeclampsia. *Hypertension*  
486 2018, 71:491-8.
- 487 [17] Brouwers L, van der Meiden-van Roest AJ, Savelkoul C, Vogelvang TE, Lely AT,  
488 Franx A, van Rijn BB: Recurrence of pre-eclampsia and the risk of future hypertension  
489 and cardiovascular disease: a systematic review and meta-analysis. *BJOG* 2018,  
490 125:1642-54.
- 491 [18] Kajantie E, Eriksson JG, Osmond C, Thornburg K, Barker DJ: Pre-eclampsia is  
492 associated with increased risk of stroke in the adult offspring: the Helsinki birth cohort  
493 study. *Stroke* 2009, 40:1176-80.
- 494 [19] Davis EF, Lazdam M, Lewandowski AJ, Worton SA, Kelly B, Kenworthy Y, Adwani  
495 S, Wilkinson AR, McCormick K, Sargent I, Redman C, Leeson P: Cardiovascular risk  
496 factors in children and young adults born to preeclamptic pregnancies: a systematic  
497 review. *Pediatrics* 2012, 129:e1552-61.
- 498 [20] Jayet PY, Rimoldi SF, Stuber T, Salmon CS, Hutter D, Rexhaj E, Thalmann S,  
499 Schwab M, Turini P, Sartori-Cucchia C, Nicod P, Villena M, Allemann Y, Scherrer U,

- 500 Sartori C: Pulmonary and systemic vascular dysfunction in young offspring of mothers  
501 with preeclampsia. *Circulation* 2010, 122:488-94.
- 502 [21] Tripathi RR, Rifas-Shiman SL, Hawley N, Hivert MF, Oken E: Hypertensive Disorders  
503 of Pregnancy and Offspring Cardiometabolic Health at Midchildhood: Project Viva  
504 Findings. *J Am Heart Assoc* 2018, 7.
- 505 [22] Kavanagh K, Dozier BL, Chavanne TJ, Fairbanks LA, Jorgensen MJ, Kaplan JR:  
506 Fetal and maternal factors associated with infant mortality in vervet monkeys. *J Med*  
507 *Primatol* 2011, 40:27-36.
- 508 [23] Strawn WB, Chappell MC, Dean RH, Kivlighn S, Ferrario CM: Inhibition of early  
509 atherogenesis by losartan in monkeys with diet-induced hypercholesterolemia.  
510 *Circulation* 2000, 101:1586-93.
- 511 [24] Strawn WB, Ferrario CM: Angiotensin II AT1 receptor blockade normalizes CD11b+  
512 monocyte production in bone marrow of hypercholesterolemic monkeys. *Atherosclerosis*  
513 2008, 196:624-32.
- 514 [25] Duckitt K, Harrington D: Risk factors for pre-eclampsia at antenatal booking:  
515 systematic review of controlled studies. *BMJ* 2005, 330:565.
- 516 [26] Bianco A, Stone J, Lynch L, Lapinski R, Berkowitz G, Berkowitz RL: Pregnancy  
517 outcome at age 40 and older. *Obstet Gynecol* 1996, 87:917-22.
- 518 [27] Luo ZC, An N, Xu HR, Larante A, Audibert F, Fraser WD: The effects and  
519 mechanisms of primiparity on the risk of pre-eclampsia: a systematic review. *Paediatr*  
520 *Perinat Epidemiol* 2007, 21 Suppl 1:36-45.
- 521 [28] Saftlas AF, Beydoun H, Triche E: Immunogenetic determinants of preeclampsia and  
522 related pregnancy disorders: a systematic review. *Obstet Gynecol* 2005, 106:162-72.

- 523 [29] Chatterjee P, Weaver LE, Chiasson VL, Young KJ, Mitchell BM: Do double-stranded  
524 RNA receptors play a role in preeclampsia? *Placenta* 2011, 32:201-5.
- 525 [30] Redman CW, Sacks GP, Sargent IL: Preeclampsia: an excessive maternal  
526 inflammatory response to pregnancy. *Am J Obstet Gynecol* 1999, 180:499-506.
- 527 [31] Saito S, Shiozaki A, Nakashima A, Sakai M, Sasaki Y: The role of the immune system  
528 in preeclampsia. *Mol Aspects Med* 2007, 28:192-209.
- 529 [32] Boucas AP, de Souza BM, Bauer AC, Crispim D: Role of Innate Immunity in  
530 Preeclampsia: A Systematic Review. *Reprod Sci* 2017, 24:1362-70.
- 531 [33] Latimer KS, Rakich PM: Clinical interpretation of leukocyte responses. *Vet Clin North*  
532 *Am Small Anim Pract* 1989, 19:637-68.
- 533 [34] Sharma V, Riddle A, Mason BA, Pampiglione J, Campbell S: An analysis of factors  
534 influencing the establishment of a clinical pregnancy in an ultrasound-based ambulatory  
535 in vitro fertilization program. *Fertil Steril* 1988, 49:468-78.
- 536 [35] Phelps JY, Levine AS, Hickman TN, Zacur HA, Wallach EE, Hinton EL: Day 4  
537 estradiol levels predict pregnancy success in women undergoing controlled ovarian  
538 hyperstimulation for IVF. *Fertil Steril* 1998, 69:1015-9.
- 539 [36] Fisher S, Grin A, Paltoo A, Shapiro HM: Falling estradiol levels as a result of  
540 intentional reduction in gonadotrophin dose are not associated with poor IVF outcomes,  
541 whereas spontaneously falling estradiol levels result in low clinical pregnancy rates. *Hum*  
542 *Reprod* 2005, 20:84-8.
- 543 [37] Michalson KT, Groban L, Howard TD, Shively CA, Sophonsritsuk A, Appt SE, Cline  
544 JM, Clarkson TB, Carr JJ, Kitzman DW, Register TC: Estradiol Treatment Initiated Early  
545 After Ovariectomy Regulates Myocardial Gene Expression and Inhibits Diastolic



546 Dysfunction in Female Cynomolgus Monkeys: Potential Roles for Calcium Homeostasis  
547 and Extracellular Matrix Remodeling. *J Am Heart Assoc* 2018, 7:e009769.

548 [38] Kahveci B, Melekoglu R, Evruke IC, Cetin C: The effect of advanced maternal age  
549 on perinatal outcomes in nulliparous singleton pregnancies. *BMC Pregnancy Childbirth*  
550 2018, 18:343.

551 [39] Odibo AO, Nelson D, Stamilio DM, Sehdev HM, Macones GA: Advanced maternal  
552 age is an independent risk factor for intrauterine growth restriction. *Am J Perinatol* 2006,  
553 23:325-8.

554 [40] Gaillard R, Bakker R, Steegers EA, Hofman A, Jaddoe VW: Maternal age during  
555 pregnancy is associated with third trimester blood pressure level: the generation R study.  
556 *Am J Hypertens* 2011, 24:1046-53.

557 [41] Matthiesen L, Berg G, Ernerudh J, Ekerfelt C, Jonsson Y, Sharma S: Immunology of  
558 preeclampsia. *Chem Immunol Allergy* 2005, 89:49-61.

559 [42] Lokki AI, Heikkinen-Eloranta JK, Laivuori H: The Immunogenetic Conundrum of  
560 Preeclampsia. *Front Immunol* 2018, 9:2630.

561 [43] Han X, Ghaemi MS, Ando K, Peterson LS, Ganio EA, Tsai AS, Gaudilliere DK, Stelzer  
562 IA, Einhaus J, Bertrand B, Stanley N, Culos A, Tanada A, Hedou J, Tsai ES, Fallahzadeh  
563 R, Wong RJ, Judy AE, Winn VD, Druzin ML, Blumenfeld YJ, Hlatky MA, Quaintance CC,  
564 Gibbs RS, Carvalho B, Shaw GM, Stevenson DK, Angst MS, Aghaeepour N, Gaudilliere  
565 B: Differential Dynamics of the Maternal Immune System in Healthy Pregnancy and  
566 Preeclampsia. *Front Immunol* 2019, 10:1305.

567 [44] Pitkin RM, Witte DL: Platelet and leukocyte counts in pregnancy. *JAMA* 1979,  
568 242:2696-8.

- 569 [45] Canzoneri BJ, Lewis DF, Groome L, Wang Y: Increased neutrophil numbers account  
570 for leukocytosis in women with preeclampsia. *Am J Perinatol* 2009, 26:729-32.
- 571 [46] Brabin BJ: An analysis of malaria in pregnancy in Africa. *Bull World Health Organ*  
572 1983, 61:1005-16.
- 573 [47] Archibald HM: The influence of malarial infection of the placenta on the incidence of  
574 prematurity. *Bull World Health Organ* 1956, 15:842-5.
- 575 [48] Walker PG, Griffin JT, Cairns M, Rogerson SJ, van Eijk AM, ter Kuile F, Ghani AC:  
576 A model of parity-dependent immunity to placental malaria. *Nat Commun* 2013, 4:1609.
- 577 [49] Ritzel RM, Patel AR, Spychala M, Verma R, Crapser J, Koellhoffer EC, Schrecengost  
578 A, Jellison ER, Zhu L, Venna VR, McCullough LD: Multiparity improves outcomes after  
579 cerebral ischemia in female mice despite features of increased metabovascular risk. *Proc*  
580 *Natl Acad Sci U S A* 2017, 114:E5673-E82.
- 581 [50] Ali AA, Rayis DA, Abdallah TM, Elbashir MI, Adam I: Severe anaemia is associated  
582 with a higher risk for preeclampsia and poor perinatal outcomes in Kassala hospital,  
583 eastern Sudan. *BMC Res Notes* 2011, 4:311.
- 584 [51] Hlimi T: Association of anemia, pre-eclampsia and eclampsia with seasonality: a  
585 realist systematic review. *Health Place* 2015, 31:180-92.
- 586 [52] Bilano VL, Ota E, Ganchimeg T, Mori R, Souza JP: Risk factors of pre-  
587 eclampsia/eclampsia and its adverse outcomes in low- and middle-income countries: a  
588 WHO secondary analysis. *PLoS One* 2014, 9:e91198.
- 589 [53] Lin L, Wei Y, Zhu W, Wang C, Su R, Feng H, Yang H, Gestational diabetes mellitus  
590 Prevalence Survey study G: Prevalence, risk factors and associated adverse pregnancy

- 591 outcomes of anaemia in Chinese pregnant women: a multicentre retrospective study.  
592 BMC Pregnancy Childbirth 2018, 18:111.
- 593 [54] Obse N, Mossie A, Gobena T: Magnitude of anemia and associated risk factors  
594 among pregnant women attending antenatal care in Shalla Woreda, West Arsi Zone,  
595 Oromia Region, Ethiopia. *Ethiop J Health Sci* 2013, 23:165-73.
- 596 [55] Zimmermann MB, Hurrell RF: Nutritional iron deficiency. *Lancet* 2007, 370:511-20.
- 597 [56] Sato AP, Fujimori E, Szarfarc SC, Borges AL, Tsunehiro MA: Food consumption  
598 and iron intake of pregnant and reproductive aged women. *Rev Lat Am Enfermagem*  
599 2010, 18:247-54.
- 600 [57] Abbaspour N, Hurrell R, Kelishadi R: Review on iron and its importance for human  
601 health. *J Res Med Sci* 2014, 19:164-74.
- 602 [58] Yang XP, Reckelhoff JF: Estrogen, hormonal replacement therapy and  
603 cardiovascular disease. *Curr Opin Nephrol Hypertens* 2011, 20:133-8.
- 604 [59] Marko KI, Simon JA: Clinical trials in menopause. *Menopause* 2018, 25:217-30.
- 605 [60] Borlaug BA, Redfield MM: Diastolic and systolic heart failure are distinct phenotypes  
606 within the heart failure spectrum. *Circulation* 2011, 123:2006-13; discussion 14.
- 607 [61] Upadhyya B, Kitzman DW: Heart Failure with Preserved Ejection Fraction in Older  
608 Adults. *Heart Fail Clin* 2017, 13:485-502.
- 609 [62] Beale AL, Nanayakkara S, Segan L, Mariani JA, Maeder MT, van Empel V, Vizi D,  
610 Evans S, Lam CSP, Kaye DM: Sex Differences in Heart Failure With Preserved Ejection  
611 Fraction Pathophysiology: A Detailed Invasive Hemodynamic and Echocardiographic  
612 Analysis. *JACC Heart Fail* 2019, 7:239-49.

- 613 [63] Zeisler H, Jirecek S, Hohlagschwandtner M, Knofler M, Tempfer C, Livingston JC:  
614 Concentrations of estrogens in patients with preeclampsia. *Wien Klin Wochenschr* 2002,  
615 114:458-61.
- 616 [64] Wan J, Hu Z, Zeng K, Yin Y, Zhao M, Chen M, Chen Q: The reduction in circulating  
617 levels of estrogen and progesterone in women with preeclampsia. *Pregnancy Hypertens*  
618 2018, 11:18-25.
- 619 [65] Hertig A, Liere P, Chabbert-Buffet N, Fort J, Pianos A, Eychenne B, Cambourg A,  
620 Schumacher M, Berkane N, Lefevre G, Uzan S, Rondeau E, Rozenberg P, Rafestin-Oblin  
621 ME: Steroid profiling in preeclamptic women: evidence for aromatase deficiency. *Am J*  
622 *Obstet Gynecol* 2010, 203:477 e1-9.
- 623 [66] Jobe SO, Tyler CT, Magness RR: Aberrant synthesis, metabolism, and plasma  
624 accumulation of circulating estrogens and estrogen metabolites in preeclampsia  
625 implications for vascular dysfunction. *Hypertension* 2013, 61:480-7.
- 626 [67] Berkane N, Liere P, Oudinet JP, Hertig A, Lefevre G, Pluchino N, Schumacher M,  
627 Chabbert-Buffet N: From Pregnancy to Preeclampsia: A Key Role for Estrogens. *Endocr*  
628 *Rev* 2017, 38:123-44.
- 629 [68] Quinn MA, McCalla A, He B, Xu X, Cidlowski JA: Silencing of maternal hepatic  
630 glucocorticoid receptor is essential for normal fetal development in mice. *Commun Biol*  
631 2019, 2:104.
- 632 [69] Quinn MA, Xu X, Ronfani M, Cidlowski JA: Estrogen Deficiency Promotes Hepatic  
633 Steatosis via a Glucocorticoid Receptor-Dependent Mechanism in Mice. *Cell Rep* 2018,  
634 22:2690-701.

- 635 [70] Whirledge S, Cidlowski JA: Estradiol antagonism of glucocorticoid-induced GILZ  
636 expression in human uterine epithelial cells and murine uterus. *Endocrinology* 2013,  
637 154:499-510.
- 638 [71] Whirledge S, Xu X, Cidlowski JA: Global gene expression analysis in human uterine  
639 epithelial cells defines new targets of glucocorticoid and estradiol antagonism. *Biol*  
640 *Reprod* 2013, 89:66.
- 641 [72] Wadhwa PD, Buss C, Entringer S, Swanson JM: Developmental origins of health and  
642 disease: brief history of the approach and current focus on epigenetic mechanisms.  
643 *Semin Reprod Med* 2009, 27:358-68.
- 644 [73] Rondo PH, Ferreira RF, Nogueira F, Ribeiro MC, Lobert H, Artes R: Maternal  
645 psychological stress and distress as predictors of low birth weight, prematurity and  
646 intrauterine growth retardation. *Eur J Clin Nutr* 2003, 57:266-72.
- 647 [74] Drousseau S, Chavez GF: Associations of intrauterine growth restriction among  
648 term infants and maternal pregnancy intendedness, initial happiness about being  
649 pregnant, and sense of control. *Pediatrics* 2003, 111:1171-5.
- 650 [75] Muhihi A, Sudfeld CR, Smith ER, Noor RA, Mshamu S, Briegleb C, Bakari M,  
651 Masanja H, Fawzi W, Chan GJ: Risk factors for small-for-gestational-age and preterm  
652 births among 19,269 Tanzanian newborns. *BMC Pregnancy Childbirth* 2016, 16:110.
- 653 [76] Huang YT, Lin HY, Wang CH, Su BH, Lin CC: Association of preterm birth and small  
654 for gestational age with metabolic outcomes in children and adolescents: A population-  
655 based cohort study from Taiwan. *Pediatr Neonatol* 2018, 59:147-53.

656 [77] Tong VT, England LJ, Rockhill KM, D'Angelo DV: Risks of Preterm Delivery and  
657 Small for Gestational Age Infants: Effects of Nondaily and Low-Intensity Daily Smoking  
658 During Pregnancy. *Paediatr Perinat Epidemiol* 2017, 31:144-8.

659 [78] Castrillio SM, Rankin KM, David RJ, Collins JW, Jr.: Small-for-gestational age and  
660 preterm birth across generations: a population-based study of Illinois births. *Matern Child*  
661 *Health J* 2014, 18:2456-64.

662 [79] Berghanel A, Heistermann M, Schulke O, Ostner J: Prenatal stress accelerates  
663 offspring growth to compensate for reduced maternal investment across mammals. *Proc*  
664 *Natl Acad Sci U S A* 2017, 114:E10658-E66.

665

666

667

668

669

670

671

672

673

674

675

676

677

678

679 **Figure Legends:**

680 **Figure 1: Maternal age is positively associated with third trimester diastolic but not**  
681 **systolic BP. (A)** Linear regression analysis between third trimester systolic BP and ma-  
682 ternal age in vervet monkeys.  $R^2=0.1148$ ;  $p=0.2575$ . **(B)** Linear regression analysis be-  
683 tween third trimester diastolic BP and maternal age in vervet monkeys.  $R^2=0.3229$ ;  
684  $p=0.0428$ . **(C)** Linear regression analysis between systolic BP and # of offspring in young  
685 (black dots) versus AMA mothers (grey dots). **(D)** Linear regression analysis between  
686 diastolic BP and # of offspring in young (black dots) versus AMA mothers (grey dots).  
687  $N=13$  monkeys, 9 young mothers and 4 AMA mothers.

688

689 **Figure 2: Advanced maternal age promotes third trimester leukocytosis. (A)** Linear  
690 regression of total circulating white blood cell count and maternal age.  $R^2=0.4085$ ;  
691  $p=0.0187$ .  $N=13$  monkeys. **(B)** Third trimester white blood cell count in young (under 10  
692 years of age) and advanced maternal age vervets.  $N=9$  young mothers and 4 advanced  
693 maternal age mothers.  $p=0.038$ .

694

695 **Figure3: Advanced maternal age is associated with neutrophilia and eosinopenia.**  
696 **(A)** Linear regression between total circulating monocyte count and maternal age.  
697  $R^2=0.02297$ ;  $p=0.6211$ . **(B)** Linear regression between total circulating basophil count and  
698 maternal age.  $R^2=0.01578$ ;  $p=0.6826$ . **(C)** Linear regression between total circulating neu-  
699 trophil count and maternal age.  $R^2=0.2835$ ;  $p=0.061$ . **(D)** Linear regression between total  
700 circulating eosinophil count and maternal age.  $R^2=0.4016$ ;  $p=0.02$ .  $N=13$  monkeys.

701

702 **Figure 4: Maternal parity but not body weight is associated with age. (A)** Linear re-  
703 gression between maternal body weight and maternal age.  $R^2=0.05163$ ;  $p=0.4553$ .  $N=13$   
704 monkeys.

705

706 **Figure 5: Advanced maternal age does not promote anemia. (A)** Linear regression  
707 between total circulating red blood cell count and maternal age.  $R^2=0.1033$ ;  $p=0.2843$ .  
708 **(B)** Linear regression between maternal hematocrit and maternal age.  $R^2=0.09349$ ;  
709  $p=0.3097$ . **(C)** Linear regression between maternal hemoglobin and maternal age.  
710  $R^2=0.05393$ ;  $p=0.4452$  **(D)** Linear regression between maternal serum iron level and ma-  
711 ternal age.  $R^2=0.02$ ;  $p=0.6610$ . **(E)** Linear regression between total iron binding capacity  
712 and maternal age.  $R^2=0.000191$ ;  $p=0.9892$ . **(F)** Linear regression between % transferrin  
713 saturation and maternal age.  $R^2=0.1612$ ;  $p=0.1958$ .  $N=13$  monkeys.

714

715 **Figure 6: Advanced maternal age disrupts hormonal responses to pregnancy. (A)**  
716 Linear regression between estradiol and maternal age. **(B)** Linear regression between  
717 progesterone and maternal age. **(C)** Linear regression between cortisol and maternal age.  
718  $N=13$  monkeys.

719

720 **Figure 7: Offspring from advanced maternal age vervets present postnatal growth**  
721 **retardation. (A)** Linear regression between fetal biparietal diameter and maternal age.  
722  $R^2=0.03142$ ;  $p=0.05624$ .  $N=13$  monkeys. **(B)** Archival growth rates of offspring from a  
723 separate cohort of young and advanced maternal age mothers in an expanded cohort of  
724 Vervet monkeys.  $n=28$  young and  $n=14$  aged. \* denotes  $p<0.05$ .



725

726 **Supplemental Figure 1: Significant association between maternal age and number**

727 **of offspring in studied cohort.** Linear regression between parity and maternal age.

728  $R^2=0.935$ ;  $p<0.0001$ . N=13 monkeys.

729

730 **Supplemental Figure 2: Maternal age does not alter circulating lymphocyte counts.**

731 Linear regression between total lymphocyte count and maternal age.  $R^2=0.02977$ ;

732  $p=0.5730$ . N=13 monkeys.

733

734

Figure 1

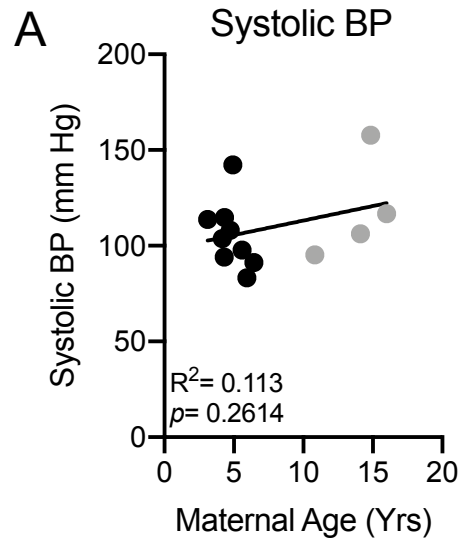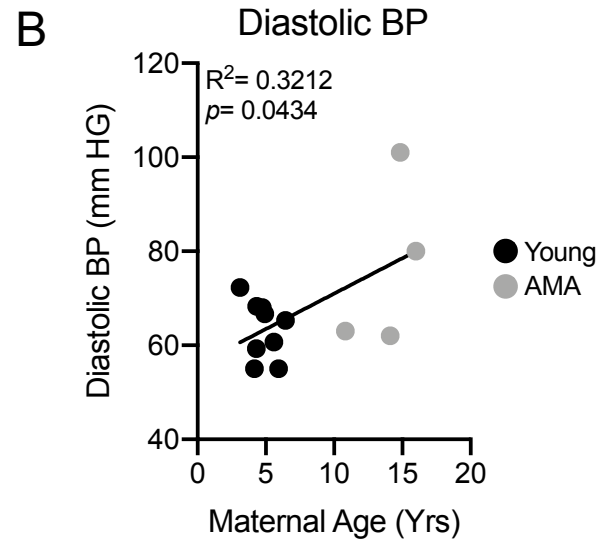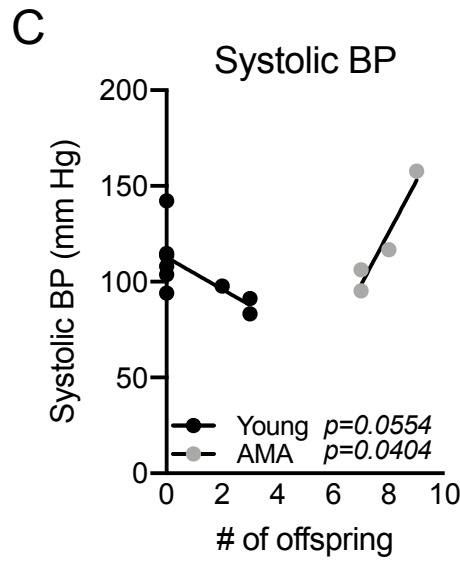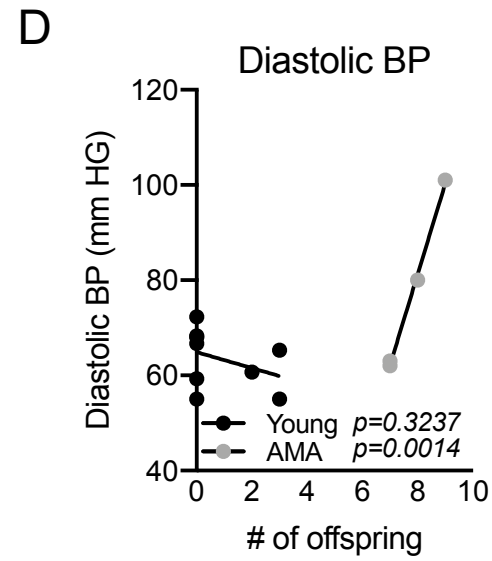

Figure 2

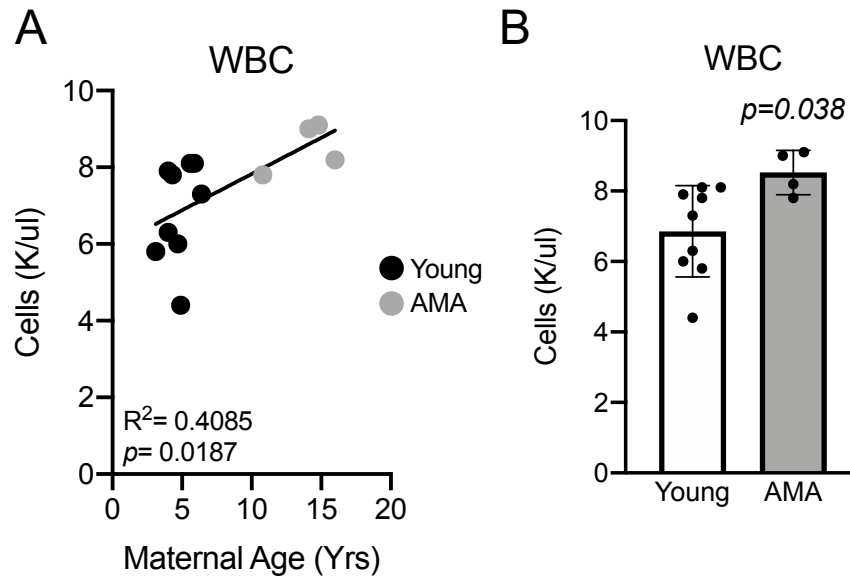

**Figure 3**

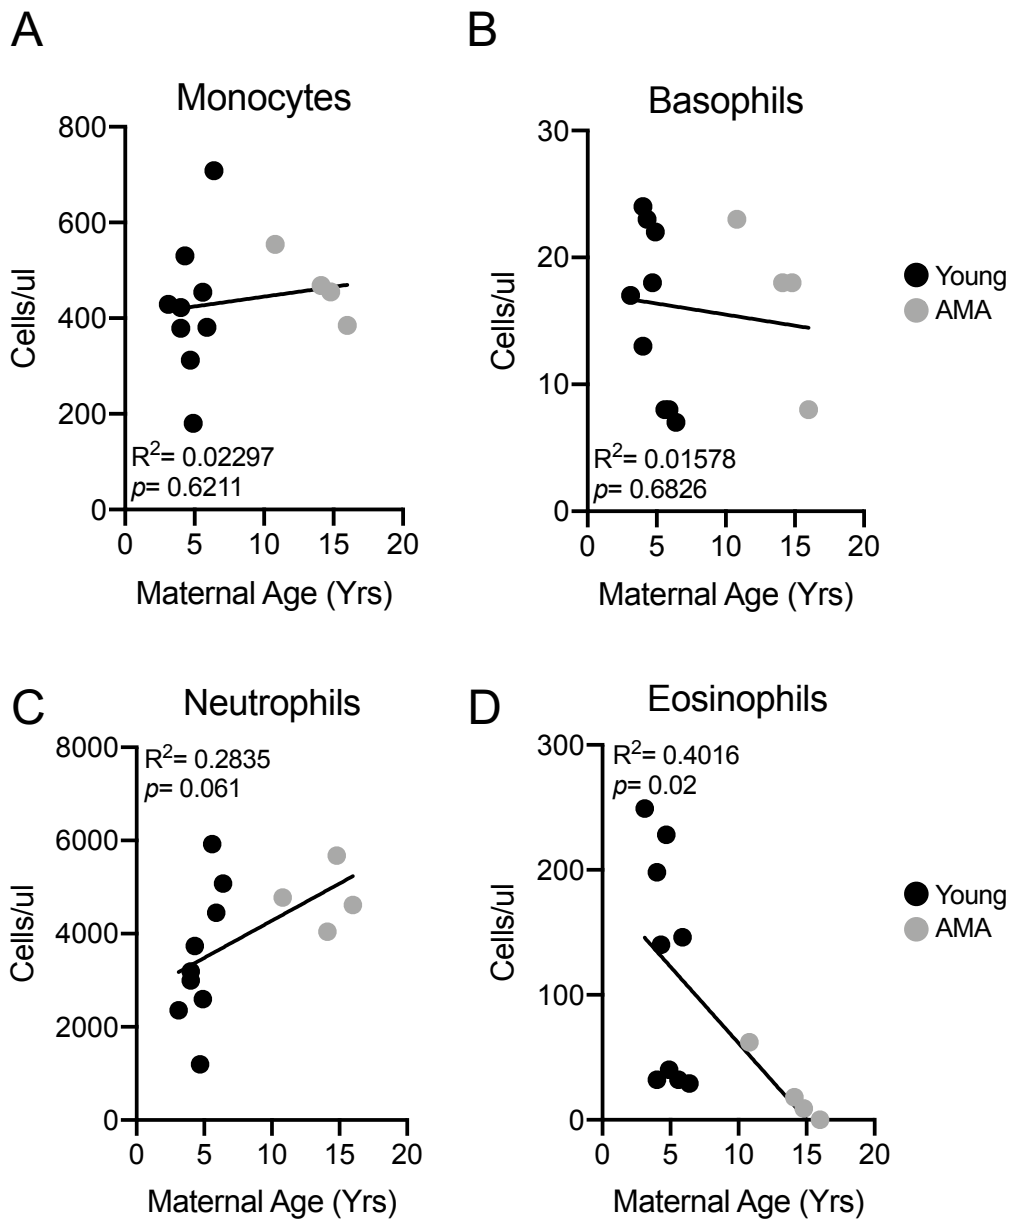

Figure 4

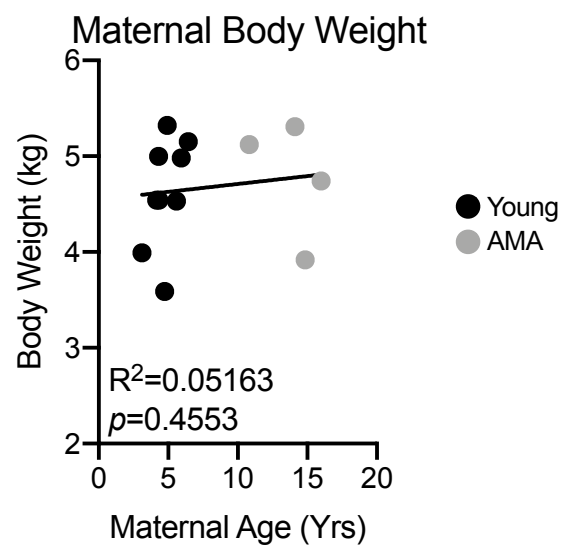

**Figure 5**

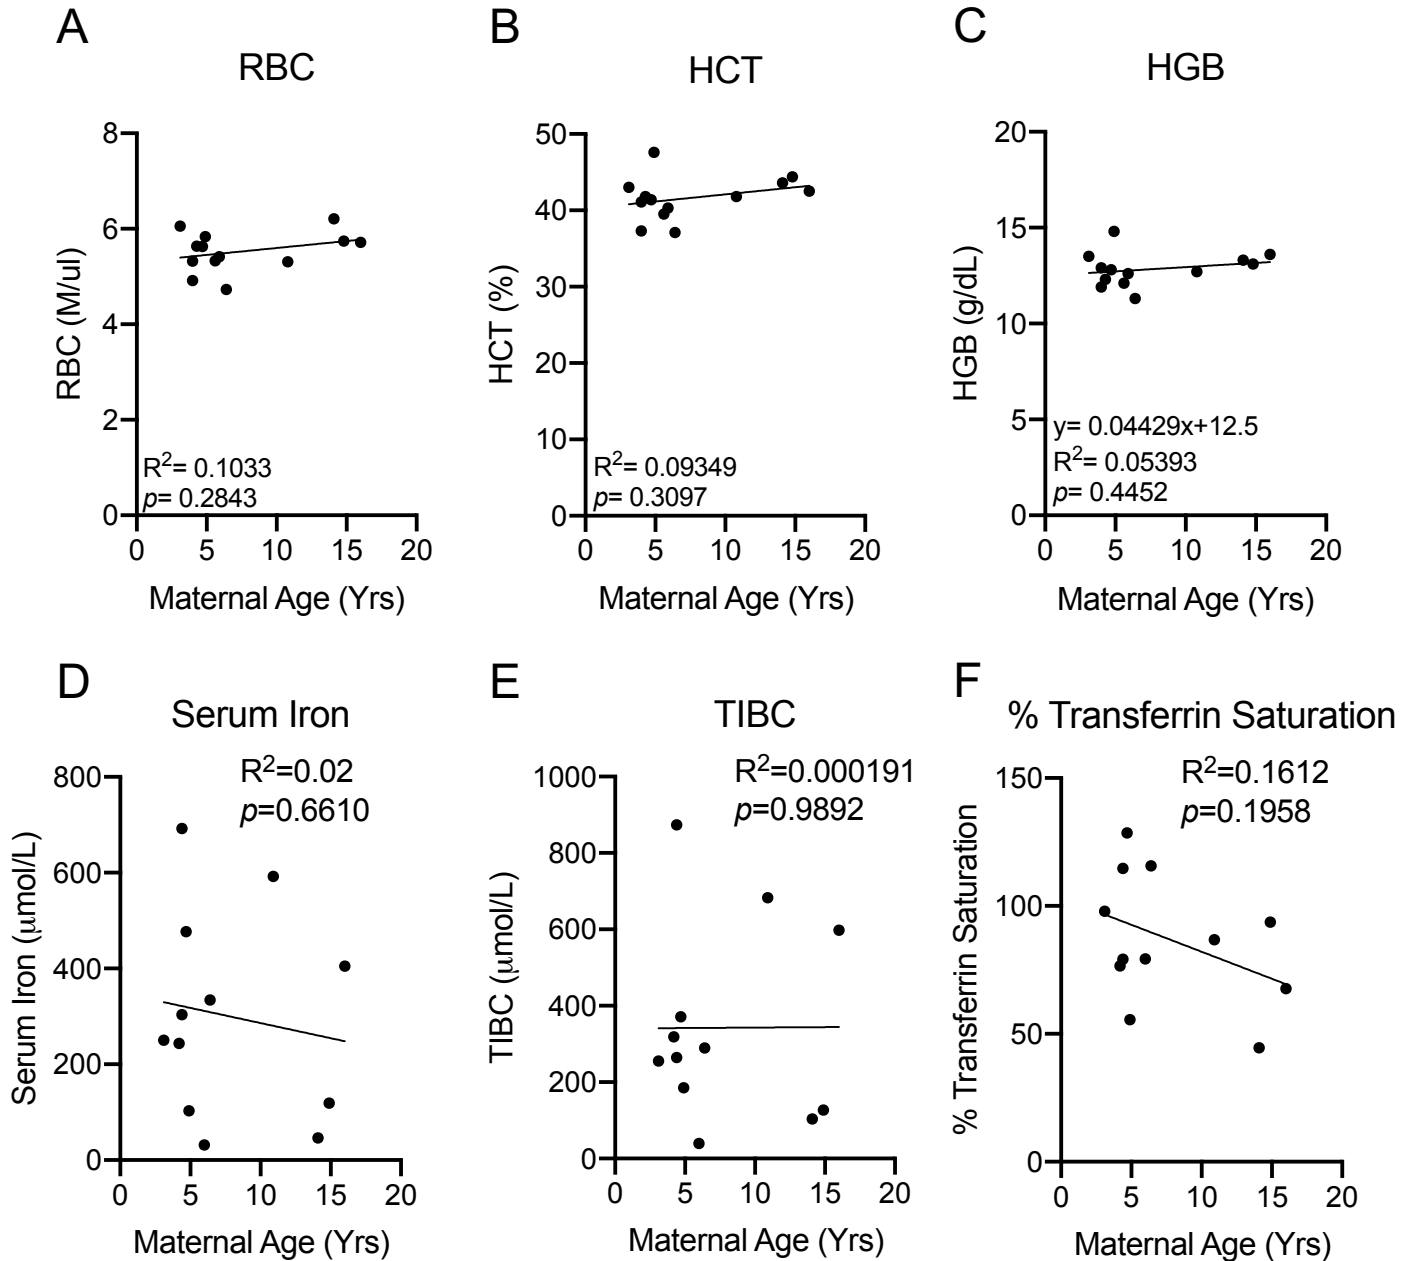

**Figure 6**

**A**

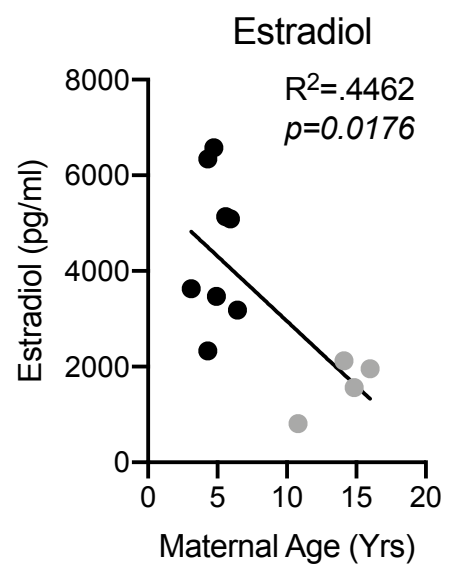

**B**

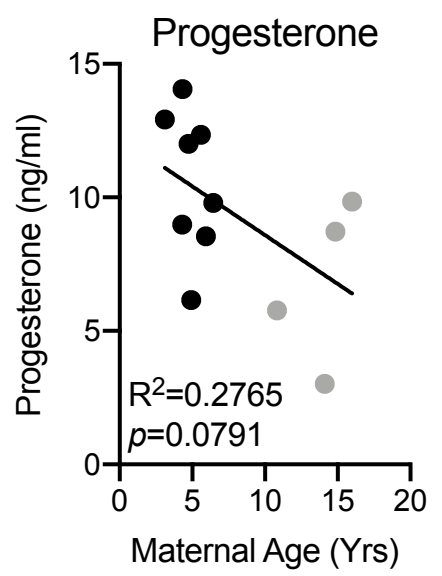

**C**

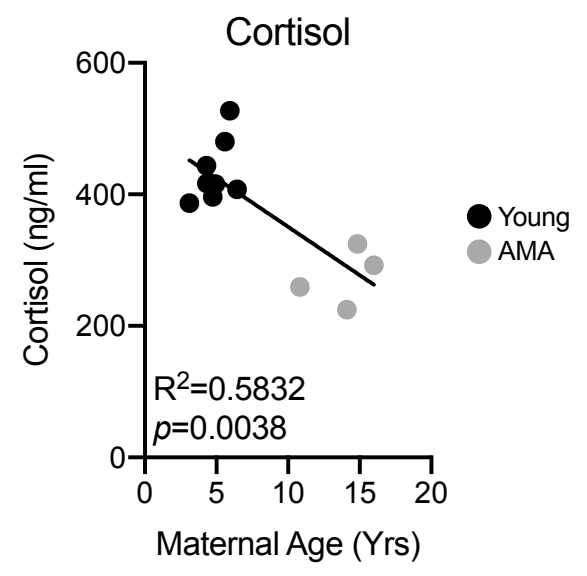

Figure 7

A

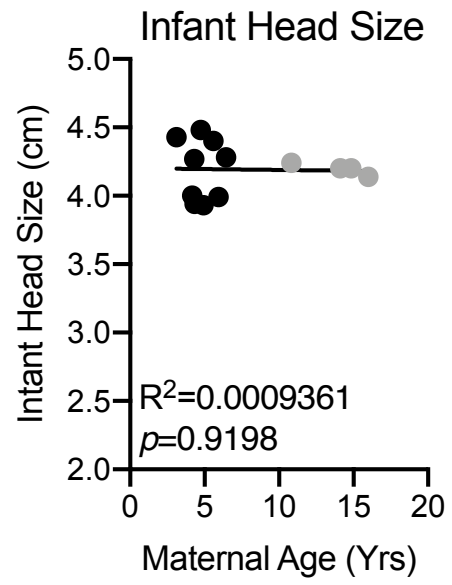

B

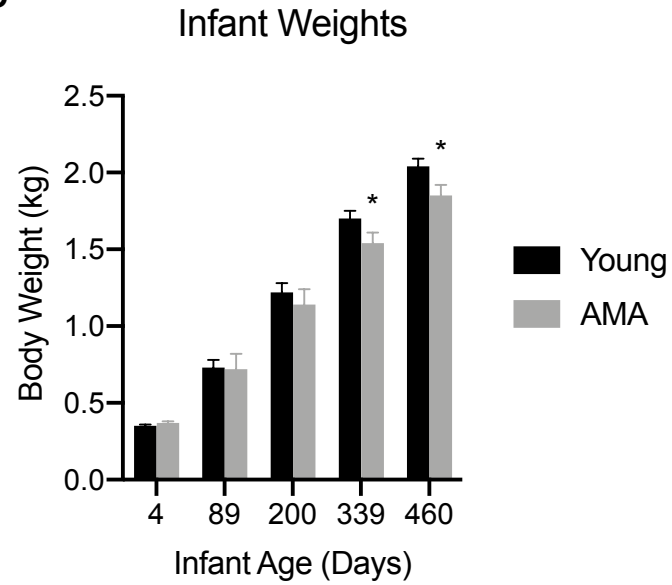



# Supplemental Figure 1

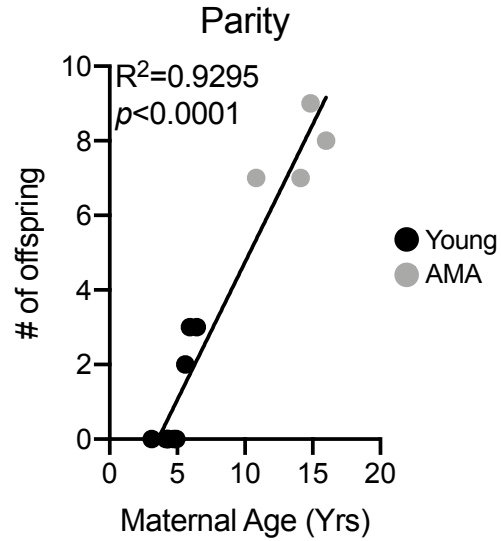

# Supplemental Figure 2

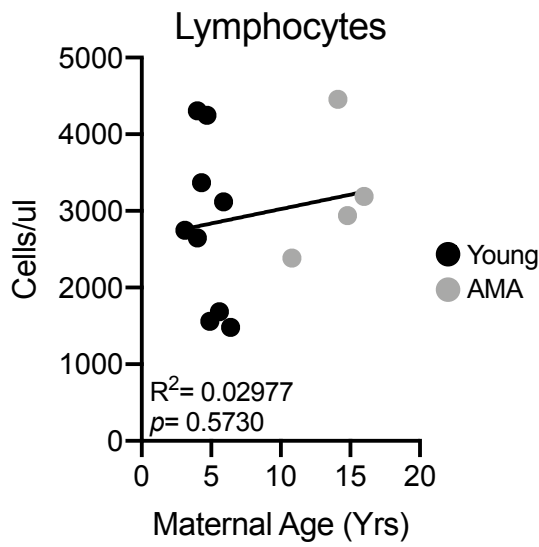

Source: http://biorxiv.org/content/10.1101/2020.04.06.027771v1.full.pdf
